# Supplementary material for: Evaluation of Glycosylated PTGS2 in Colorectal Cancer for NSAIDS-Based Adjuvant Therapy
Source: MDPI journal article supplement (doi:10.3390/cells9030683), 2020-03-11
Supplement: s1 [file s1]

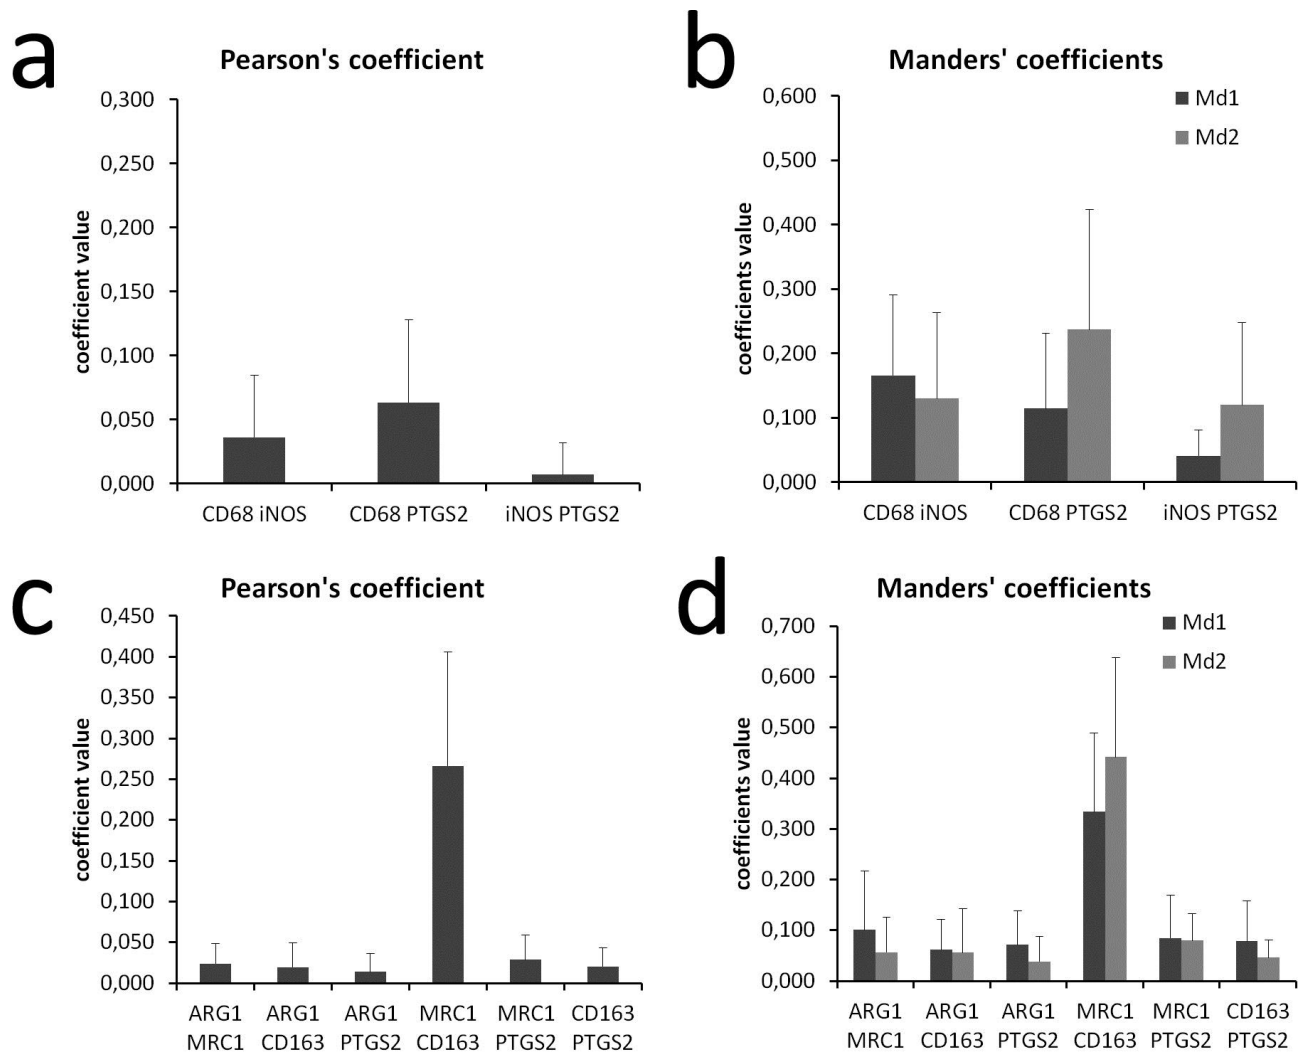

**Supplementary Figure S2.** Analysis of 1:1 colocalization of M1 and M2 macrophage markers with PTGS2 by the JACoP plug-in: mean and standard deviation of Pearson's correlation coefficients in the M1 (a) and M2 (c) series; mean and standard deviation of Manders' overlap coefficients in the M1 (b) and M2 (d) series.

Note: Manders' overlap coefficients express the extent of co-occurrence of two markers. Md1 and Md2 represent the colocalization of the first marker over the second and vice versa. For example in panel b the CD68 - PTGS2 relation is evaluated as Md1 (CD68 signal overlapping with PTGS2) and Md2 (PTGS2 signal overlapping with CD68) and shows a prevalence of the second overlap.
