# Supplementary material for: Evaluation of Glycosylated PTGS2 in Colorectal Cancer for NSAIDS-Based Adjuvant Therapy
Source: MDPI journal article supplement (doi:10.3390/cells9030683), 2020-03-11
Supplement: s1 [file s1]

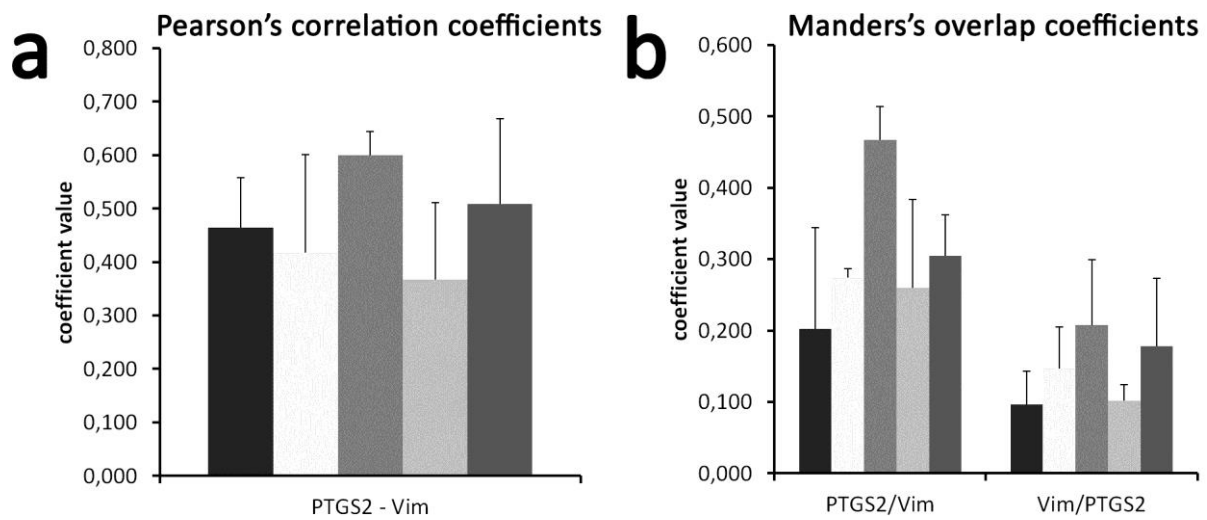

**Supplementary Figure S3.** JACop colocalization analysis of PTGS2 and Vimentin fluorescent staining: graphical representation of Pearson's (a) and Manders' (b) analyses of PTGS2 and vimentin colocalization in multiple fields of five CRC cases, after threshold subtraction of dim vimentin -positive cells. Mean Pearson correlation index ranged from 0.367 to 0.600 indicating a high degree of PTGS2-vimentin colocalization also after eliminating a potential spurious signal. Manders overlap coefficients confirm that PTGS2 has a high correspondence with vimentin, while the opposite linkage is less evident.
