# Supplementary material for: Evaluation of Glycosylated PTGS2 in Colorectal Cancer for NSAIDS-Based Adjuvant Therapy
Source: MDPI journal article supplement (doi:10.3390/cells9030683), 2020-03-11
Supplement: s1 [file s1]

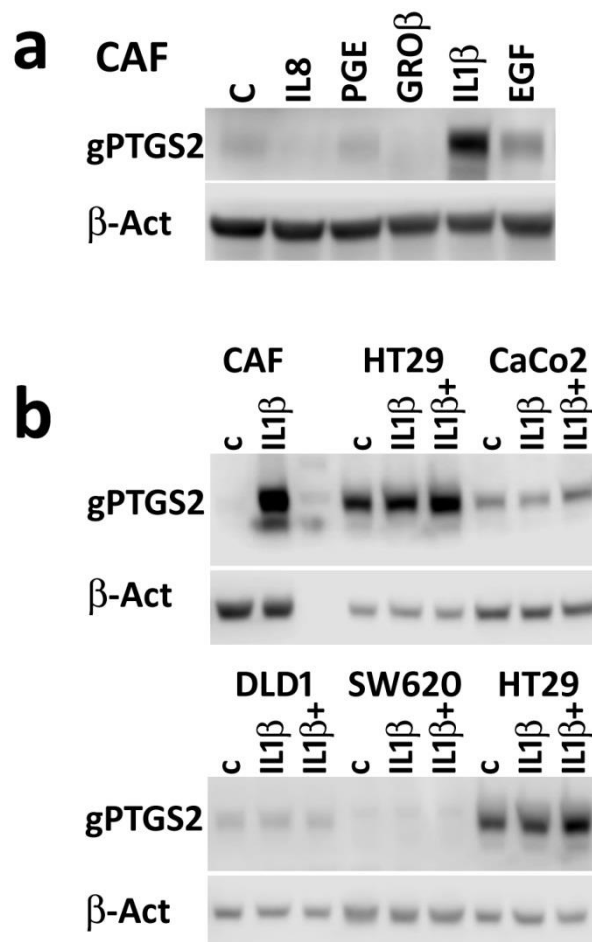

**Supplementary Figure S2.** Confirm of western blot data shown in Figure 4: (a) induction of PTGS2 expression in CAF primary cultures by CXCL8/IL8 (10 ng/ml), PGE2 (100 nM), CXCL2/Gro $\beta$  (10 ng/ml), IL1 $\beta$  (0.1 ng/ml), EGF (10ng/ml), 24h treatment; (b) CAF and CRC cell lines treated with 0.1ng/ml (IL1 $\beta$ ) or 1ng/ml (IL1 $\beta$ +) IL1 $\beta$ . A 10x IL1 $\beta$  increase substantially affected PTGS2 levels only in the HT29 cell line.
