# Supplementary material for: Evaluation of Glycosylated PTGS2 in Colorectal Cancer for NSAIDS-Based Adjuvant Therapy
Source: MDPI journal article supplement (doi:10.3390/cells9030683), 2020-03-11
Supplement: s1 [file s1]

## Supplementary Table 1

### PTGS2/COX2 expression in CRC (literature)

| Reference | n° patients            | Mucosa                          | CRC                                 | Method    | Antibody                                                  | Immunogen                                              | Source                                |
|-----------|------------------------|---------------------------------|-------------------------------------|-----------|-----------------------------------------------------------|--------------------------------------------------------|---------------------------------------|
| [1]       | 37 (25 CRC)            | 8%                              | 76%                                 | WB        | rabbit antiserum                                          | full ovine PTGS2                                       | Home - made                           |
| [2]       | 39                     | not reported                    | 56,4%<br>(90% Rect, 21% Col)        | WB        | nd                                                        | hu PTGS2, region not specified                         | Santa Cruz                            |
| [3]       | 30                     | 23%                             | 73%                                 | WB        | ab1519<br>rabbit polyclonal                               | carboxy-terminal peptide (rat), sequence not available | Abcam                                 |
| [4]       | 31                     | negative (IHC)<br>20% (WB 3/15) | 96,7% (IHC 30/31)<br>93% (WB 14/15) | IHC<br>WB | SC-1745 (IHC)<br>goat polyclonal<br>nd (WB)<br>polyclonal | carboxy-terminal peptide (hu), sequence not available  | Santa Cruz (IHC)<br>Cayman (WB)       |
| [5]       | 35 (31 analyzed)       | nd                              | 87%                                 | IHC       | 160106<br>rabbit polyclonal                               | AA 570-598 (murine)                                    | Cayman                                |
| [6]       | 76                     | nd                              | 81,5%                               | IHC       | rabbit antiserum                                          | AA 588-600 (hu)                                        | Home- made                            |
| [7]       | 112                    | 17%                             | 72%                                 | IHC       | nd, rabbit polyclonal<br>( SC-7951? †)                    | AA 50-111 hu                                           | Cayman<br>(Santa Cruz? †)             |
| [8]       | 170 (139 CRC)          | 24,1% (7/29)                    | 84,9%                               | IHC       | nd                                                        | nd                                                     | Cayman                                |
| [9]       | 288                    | 10% (1/10)                      | 70,8% (204/288)                     | IHC       | nd                                                        | nd                                                     | Cayman                                |
| [10]      | 747                    | nd                              | 85,3%                               | IHC       | SC-1745<br>goat polyclonal                                | carboxy-terminal peptide (hu), sequence not available  | Santa Cruz                            |
| [11]      | 167 (23 CRC)           | negative                        | 40%                                 | IHC       | clone CX-294<br>mouse mAb                                 | AA 580-598 hu                                          | Dako                                  |
| [12]      | 636                    | nd                              | 67%                                 | IHC       | 160112 (‡)<br>mouse mAb                                   | AA 580-599 hu                                          | Cayman                                |
| [13]      | 758 (207 CRC)          | nd                              | 85%<br>(65% strong)                 | IHC       | 160112 (‡)<br>mouse mAb                                   | AA 580-599 hu                                          | Cayman                                |
| [14]      | 662                    | nd                              | 83%                                 | IHC       | 160112 (‡)<br>mouse mAb                                   | AA 580-599 hu                                          | Cayman                                |
| [15]      | 118 (Col)<br>85 (Rect) | nd                              | 93% (Col)<br>87% (Rect)             | IHC       | SP21 rabbit mAb                                           | carboxy-terminal peptide (rat), sequence not available | Thermo Fisher Scientific              |
| [16]      | 1026                   | 12% (6/50)                      | 77.9% (800/1026)                    | IHC       | SP21 rabbit mAb                                           | carboxy-terminal peptide (rat), sequence not available | Zhongshan Golden Bridge Biotechnology |

† At present the only PTGS2 antibody raised against AA 50-111 is SC-7951 (Santa Cruz), we do not know if a similar product was available from Cayman in 2002.

‡ These papers used the same Cayman antibody, but we were unable to categorize it. Prof. Ogino has kindly provided us the exact product identity.

#### References:

1. Kargman SL, O'Neill GP, Vickers PJ, Evans JF, Mancini JA and Jothy S: Expression of Prostaglandin G/H Synthase-1 and -2 Protein in Human Colon Cancer. *Cancer Res* 55: 2556–2559, 1995.
2. Dimberg J, Samuelsson A, Hugander A and Soderkvist P: Differential expression of cyclooxygenase 2 in human colorectal cancer. *Gut* 45: 730–732, 1999.
3. Asting AG, Farivar A, Iresjö B-M, Svensson H, Gustavsson B and Lundholm K: EGF receptor and COX-1/COX-2 enzyme proteins as related to corresponding mRNAs in human per-operative biopsies of colorectal cancer. *BMC Cancer* 13: 511, 2013.
4. Cianchi F, Cortesini C, Bechi P, *et al.*: Up-regulation of cyclooxygenase 2 gene expression correlates with tumor angiogenesis in human colorectal cancer. *Gastroenterology* 121: 1339–1347, 2001.
5. Shattuck-Brandt RL, Lamps LW, Heppner Goss KJ, DuBois RN and Matrisian LM: Differential expression of

matrilysin and cyclooxygenase-2 in intestinal and colorectal neoplasms. *Mol Carcinog* 24: 177–187, 1999.

6. Sheehan KM, Gulmann C, Eichler GS, *et al.*: Signal pathway profiling of epithelial and stromal compartments of colonic carcinoma reveals epithelial-mesenchymal transition. *Oncogene* 27: 323–331, 2008.
7. Zhang H and Sun X-F: Overexpression of cyclooxygenase-2 correlates with advanced stages of colorectal cancer. *Am J Gastroenterol* 97: 1037–1041, 2002.
8. Wu A-W, Gu J, Ji J-F, Li Z-F and Xu G-W: Role of COX-2 in carcinogenesis of colorectal cancer and its relationship with tumor biological characteristics and patients' prognosis. *World J Gastroenterol* 9: 1990–1994, 2003.
9. Soumaoro LT, Uetake H, Higuchi T, Takagi Y, Enomoto M and Sugihara K: Cyclooxygenase-2 expression: a significant prognostic indicator for patients with colorectal cancer. *Clin Cancer Res Off J Am Assoc Cancer Res* 10: 8465–8471, 2004.
10. Fux R, Schwab M, Thon K-P, Gleiter CH and Fritz P: Cyclooxygenase-2 Expression in Human Colorectal Cancer Is Unrelated to Overall Patient Survival. *Clin Cancer Res* 11: 4754–4760, 2005.
11. Balbinotti RA, Ribeiro U, Sakai P, *et al.*: hMLH1, hMSH2 and cyclooxygenase-2 (cox-2) in sporadic colorectal polyps. *Anticancer Res* 27: 4465–4471, 2007.
12. Chan AT, Ogino S and Fuchs CS: Aspirin and the Risk of Colorectal Cancer in Relation to the Expression of COX-2. *N Engl J Med* 356: 2131–2142, 2007.
13. Kawasaki T, Nosho K, Ohnishi M, *et al.*: Cyclooxygenase-2 overexpression is common in serrated and non-serrated colorectal adenoma, but uncommon in hyperplastic polyp and sessile serrated polyp/adenoma. *BMC Cancer* 8: 33, 2008.
14. Ogino S, Kirkner GJ, Nosho K, *et al.*: Cyclooxygenase-2 expression is an independent predictor of poor prognosis in colon cancer. *Clin Cancer Res Off J Am Assoc Cancer Res* 14: 8221–8227, 2008.
15. Lobo Prabhu KC, Vu L, Chan SK, Phang T, Gown A, Jones SJ and Wiseman SM: Predictive utility of cyclooxygenase-2 expression by colon and rectal cancer. *Am J Surg* 207: 712–716, 2014.
16. Wu Q-B and Sun G-P: Expression of COX-2 and HER-2 in colorectal cancer and their correlation. *World J Gastroenterol* 21: 6206–6214, 2015.
