# Supplementary material for: Evaluation of Glycosylated PTGS2 in Colorectal Cancer for NSAIDS-Based Adjuvant Therapy
Source: MDPI journal article supplement (doi:10.3390/cells9030683), 2020-03-11
Supplement: s1 [file s1]

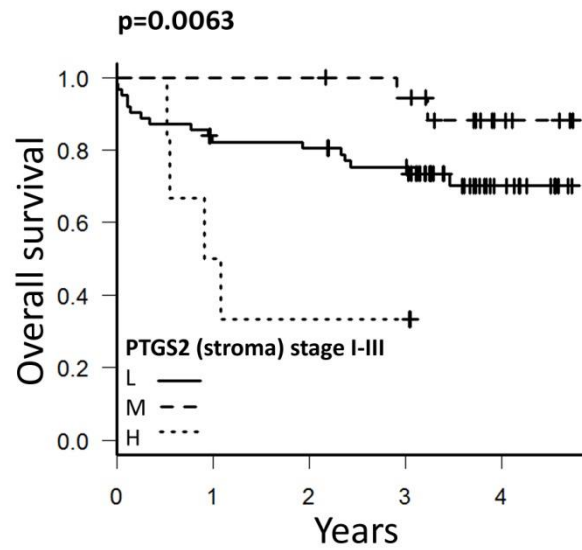

**Supplementary Figure S3.** Effects of PTGS2 localization on patients overall survival: Kaplan-Meier analysis of patients overall survival (stage I-III CRC only) according to PTGS2 levels quantified by IHC in stromal cells. L=low, M=medium, or H=high PTGS2 expression. The exclusion of stage IV patients does not modify the prognostic prediction of stromal PTGS2 expression, excluding a possible bias in OS evaluation linked to the persistence or resection of hepatic metastases..
