# Supplementary material for: Evaluation of Glycosylated PTGS2 in Colorectal Cancer for NSAIDS-Based Adjuvant Therapy
Source: Cells. 2020 Mar 11;9(3):683. doi: 10.3390/cells9030683 (PMC7140631; doi:10.3390/cells9030683)
Supplement: Supplementary file 1 [file cells-09-00683-s001.zip]

Archive with 8 entries (8 files):
- Suppl files/Supplementary Figure S1.pdf
- Suppl files/Supplementary Figure S2.pdf
- Suppl files/Supplementary Figure S3.pdf
- Suppl files/Supplementary Figure S4.pdf
- Suppl files/Supplementary Figure S5.pdf
- Suppl files/Supplementary method S1.pdf
- Suppl files/Supplementary Table S1.pdf
- Suppl files/Supplemetary data S1.xlsx
