# Supplementary material for: Evaluation of Glycosylated PTGS2 in Colorectal Cancer for NSAIDS-Based Adjuvant Therapy
Source: Cells. 2020 Mar 11;9(3):683. doi: 10.3390/cells9030683 (PMC7140631; doi:10.3390/cells9030683)
Supplement: Supplementary file 1 [file cells-09-00683-s001.zip › Suppl files/Supplemetary data S1.xlsx]

## Sheet: Foglio1
F-up Y	dead	Age-dicot	DX-SX-Rt	Jass-score	Stage	PNI	MSI	Muc	PTGS2	PTGS2 L-H median	IL1b	IL1b L-H median	C-D_IL1-PTGS2	PTGS2-Mf-K (IHC)	PTGS2-Epi-K (IHC)
3.20822	0	>70	Rt	IV	III	0	0	0	0	L	3.61014	L	C	1	1
0.0575342	1	<=70	Dx	III	II	1	0	0	0	L	4.24686	L	C	1	1
3.05479	0	<=70	Dx	IV	III	0	1	0	0	L	5.28165	L	C	3	3
0.139726	1	>70	Dx	I	II	0	1	1	0	L	16.8459	H	D	1	1
0.80274	1	<=70	Rt	III	IV	1	0	0	0.000662203	L				1	1
2.2	0	>70	Sx	II	II	0	0	0	0.00268844	L	3.69346	L	C	1	1
3.88493	0	>70	Rt	I	I	0	0	2	0.00693649	L	2.19581	L	C	1	1
0.610959	1	<=70	Dx	IV	IV	1	0	0	0.00837211	L				1	1
2.91781	1	>70	Dx	IV	III	0	1	1	0.0147835	L				2	1
4.59178	0	>70	Sx	II	I	0	0	0	0.0223505	L				1	1
3.25479	0	>70	Dx	II	II	0	0	0	0.0323603	L	4.70723	L	C	1	1
0.994521	1	>70	Dx	IV	III	1		0	0.0517515	L				1	2
4.73425	0	>70	Rt	III	III	0	0	0	0.0525481	L				1	1
4.05753	0	>70	Dx	I	I	0	0	1	0.0939566	L				1	1
3.92329	0	>70	Sx	IV	III	1	0	0	0.0956413	L	2.55234	L	C	2	1
3.90137	0	>70	Dx	II	II	0	1	0	0.0968979	L	28.4581	H	D	2	1
3.03836	0	>70	Sx	IV	III	0	0	2	0.0981026	L	6.48423	L	C	1	1
3.8274	0	>70	Rt	III	II	0		0	0.113938	L	4.19999	L	C	1	1
3.30685	0	>70	Sx	III	III	0	0	0	0.131564	L	4.00047	L	C	2	1
2.3589	1	<=70	Sx	IV	IV	0	0	0	0.134152	L				1	1
3.84658	0	<=70	Sx	III	III	0	0	1	0.14979	L	6.79725	L	C	1	1
3.71781	0	<=70	Dx	III	II	1		0	0.15491	L				1	3
3.11507	0	<=70	Rt	III	II	0	0	0	0.160796	L	2.32847	L	C	1	2
2.30685	1	<=70	Dx	III	IV	0	0	0	0.16254	L				2	2
0.969863	0	<=70	Dx	III	III	0	0	0	0.194104	L				1	1
0.0191781	1	<=70	Sx	III	II	0	0	0	0.196647	L				1	1
4.26849	0	>70	Dx	IV	III	0	0	0	0.220069	L				1	2
1.18082	1	<=70	Sx	IV	IV	1	0	0	0.234367	L	3.44406	L	C	1	1
2.37534	1	<=70	Dx	III	III	0	0	0	0.240423	L				1	1
4.13151	0	>70	Sx	III	II	0	0	0	0.241172	L				1	1
2.43562	1	>70	Sx	IV	III	0	0	0	0.292112	L				1	1
4.51507	0	>70	Rt	I	I	0	0	0	0.304161	L				1	1
3.29041	0	>70	Dx	I	I	0	1	0	0.316645	L	4.39471	L	C	1	3
3.7726	0	>70	Dx	IV	III	0	0	0	0.349095	L	7.52279	H	D	1	1
0.964384	0	>70	Rt	III	II	0	0	0	0.352064	L				1	1
4.74247	0	<=70	Sx	III	II	1	0	0	0.352656	L				2	1
3.11781	0	<=70	Sx	I	I	0	0	0	0.353408	L	4.11271	L	C	1	1
3.23562	1	<=70	Dx	IV	III	0	0	0	0.373617	L	1.1521	L	C	2	1
3.03562	1	>70	Sx	IV	III	1		0	0.398474	L	3.92174	L	C	1	1
0.972603	1	>70	Dx	IV	IV	1		0	0.409805	L	6.95248	L	C	1	1
4.18904	0	>70	Rt	IV	III	1	0	0	0.417027	L				1	1
4.19178	0	<=70	Dx	II	III	0	0	0	0.422051	L				1	1
3.21644	0	<=70	Rt	III	II	0	0	0	0.426736	L	8.02709	H	D	1	1
0.109589	1	>70	Sx	IV	III	0	0	0	0.428453	L	20.0232	H	D	1	1
3.30411	0	<=70	Rt	I	I	0	0	0	0.445328	L	7.32485	H	D	2	1
3.01918	0	<=70	Sx	IV	III	1	0	0	0.453234	L	20.2848	H	D	1	1
3.21096	0	<=70	Sx	II	II	0	0	0	0.460244	L	2.40896	L	C	1	1
1.93151	1	>70	Dx	III	II	0	0	0	0.46581	L	2.27491	L	C	1	2
0.868493	1	<=70	Sx	IV	IV	1	0	0	0.495682	L	21.4696	H	D	1	1
3.29315	0	>70	Dx	III	II	0	0	1	0.498504	L	6.06981	L	C	1	2
3.19726	0	<=70	Sx	III	IV	0	0	1	0.570999	H	7.32485	H	C	1	1
3.21644	0	>70	Dx	III	II	0	1	1	0.610939	H	10.5845	H	C	2	1
0.164384	1	>70	Sx	IV	IV	1	0	2	0.66791	H	7.26428	L	D	1	1
3.59726	0	>70	Sx	I	I	0	0	1	0.675529	H				1	1
3.26575	0	<=70	Rt	II	III	0	0	0	0.683581	H	5.31058	L	D	1	1
0.117808	1	<=70	Dx	IV	III	0	0	0	0.700556	H	6.18782	L	D	1	1
2.33699	1	>70	Dx	IV	III	1		0	0.712042	H	4.70723	L	D	1	1
3.73425	0	<=70	Sx	IV	IV	1	0	0	0.752746	H	31.6391	H	C	2	1
4.04384	0	<=70	Sx	III	II	0	0	0	0.776273	H				2	1
3.61918	0	<=70	Dx	I	II	0	1	2	0.816177	H				1	2
1.73151	1	<=70	Rt	IV	IV	1	0	1	0.900715	H	7.93489	H	C	1	3
3.71781	0	>70	Dx	II	I	0		0	0.947604	H				2	1
3.40548	0	>70	Sx	III	II	0	0	1	0.972132	H				1	2
3.27123	0	>70	Dx	I	I	0	1	1	1.01063	H	4.65023	L	D	1	2
3.06027	0	>70	Dx	II	II	0	0	0	1.06539	H	15.7381	H	C	1	2
3.39178	0	>70	Sx	III	III	0	0	0	1.09491	H	3.25122	L	D	1	1
2.04932	1	<=70	Rt	IV	IV	1	0	0	1.16228	H				1	1
3.78904	0	<=70	Rt	I	I	0	0	0	1.19177	H	15.9817	H	C	2	1
0.769863	1	>70	Dx	IV	III	1	0	2	1.21897	H	6.27653	L	D	1	1
4.71507	0	<=70	Rt	I	I	0		0	1.23403	H				2	2
3.92055	0	<=70	Sx	III	III	0	0	0	1.24531	H	33.1432	H	C	1	1
0.345205	1	>70	Dx	III	II	1	1	1	1.25276	H	17.5167	H	C	1	2
3.06027	0	>70	Sx	II	II	0	0	0	1.35933	H	14.5799	H	C	2	1
3.39178	0	<=70	Sx	III	III	0	0	0	1.57445	H				1	1
3.67123	0	<=70	Sx	I	I	0	0	0	1.57589	H				1	1
4.6	0	<=70	Dx	II	I	0		0	1.60423	H				2	1
3.73699	0	<=70	Rt	III	II	0	0	0	1.69417	H	51.3795	H	C	1	1
0.553425	1	>70	Dx	IV	III	0	1	0	1.69428	H	118.663	H	C	3	3
3.15616	0	<=70	Dx	I	III	0	1	1	1.78625	H	54.1868	H	C	1	3
0.00821918	1	>70	Rt	II	II	1	0	0	1.78663	H	20.8939	H	C	1	1
3.46027	1	>70	Dx	IV	III	1	0	0	1.79334	H				1	1
4.11507	0	>70	Dx	I	II	0	1	2	1.84396	H				2	1
2.17534	0	<=70	Sx	II	II	1	0	0	1.99558	H	125.042	H	C	2	1
3.92055	0	<=70	Dx	I	II	0	1	1	2.00144	H	170.682	H	C	2	3
3.73151	0	>70	Sx	III	II	0	0	0	2.03351	H	88.0369	H	C	2	3
4.69041	0	<=70	Rt	I	II	0	0	0	2.27687	H				1	2
3.13699	0	<=70	Dx	III	II	0	0	0	2.34487	H	20.1712	H	C	1	2
4.56164	0	<=70	Sx	IV	III	0		0	2.39853	H				1	1
0.526027	1	>70	Sx	IV	III	0	0	0	2.45145	H	7.06634	L	D	3	1
3.80548	0	>70	Rt	III	IV	1		0	2.46036	H	4.52758	L	D	2	2
3.25479	0	<=70	Dx	II	II	0	1	0	2.51333	H	23.3815	H	C	1	1
0.249315	1	<=70	Sx	III	II	1		0	2.53733	H				1	1
4.55616	0	>70	Dx	IV	III	1	0	0	2.62448	H				1	1
3.04658	0	>70	Dx	IV	III	1	0	1	2.66839	H	205.173	H	C	3	3
4.74521	0	<=70	Dx	III	II	0	0	0	2.87263	H				2	3
2.19452	0	<=70	Dx	IV	III	1	0	0	3.0385	H	26.8946	H	C	1	2
0.953425	1	<=70	Sx	IV	III	1	0	1	3.96132	H	184.526	H	C	1	1
1.08493	1	>70	Dx	IV	III	0	1	0	4.14514	H				3	3
3.25205	0	<=70	Rt	IV	III	1	0	0	4.60684	H	16.4864	H	C	1	1
0.915068	1	<=70	Sx	IV	III	1		2	5.167	H				3	3
