# Supplementary figures and images for: Evaluation of Glycosylated PTGS2 in Colorectal Cancer for NSAIDS-Based Adjuvant Therapy
Source: MDPI journal article supplement (doi:10.3390/cells9030683), 2020-03-11

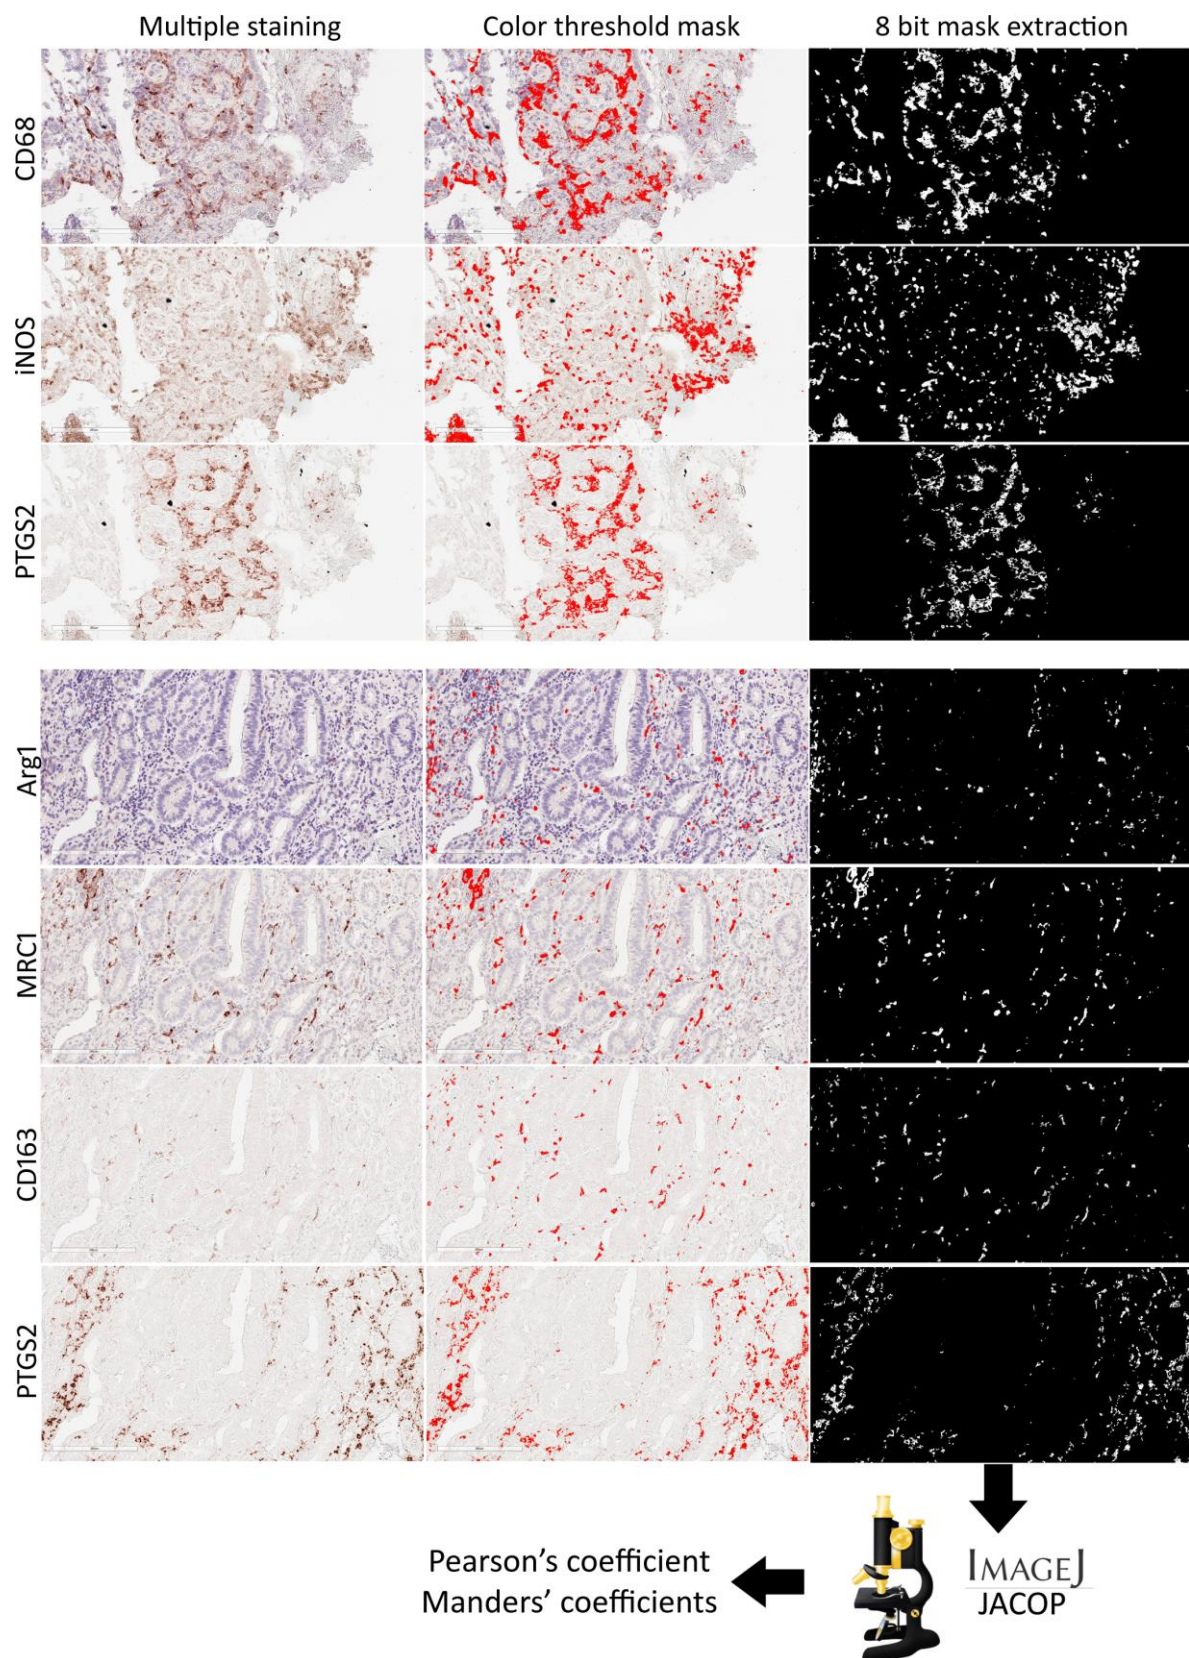

**Supplementary Figure S1.** Example of multiplex IHC and method for overlay computation.

Supplement: s1 [file s1]
